# Supplementary material for: Nanoporous silicon from low-cost natural clinoptilolite for lithium storage
Source: Royal Society of Chemistry journal article supplement (doi:10.1039/c5ra08622a), 2015-01-01
Supplement: c5ra08622a1.pdf [file c5ra08622a1.pdf]

## Electronic Supplementary Information

# Nanoporous Silicon from Low-cost Natural Clinoptilolite for Lithium Storage

Rongrong Miao,<sup>a</sup> Jun Yang\*,<sup>a</sup> Yanan Wu,<sup>a</sup> Jiulin Wang,<sup>a</sup> Yanna Nuli,<sup>a</sup> and Wei Lu<sup>b</sup>

<sup>a</sup> Shanghai Electrochemical Energy Devices Research Center, School of Chemistry & Chemical Engineering, Shanghai Jiao Tong University, Shanghai 200240, China. Fax: (+86)-21-54747667; Tel: (+86)-21-54747667; E-mail: yangj723@sjtu.edu.cn (J. Yang)

<sup>b</sup> Department of Chemical Engineering, University of Michigan, Ann Arbor, MI 48109 (USA)

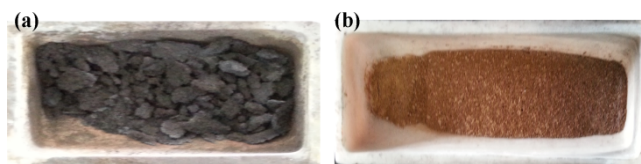

**Fig. S1.** Images of (a) products obtained by magnesiothermic reduction from NCLI without and (b) with ball-milling pretreatment (before acid etching)

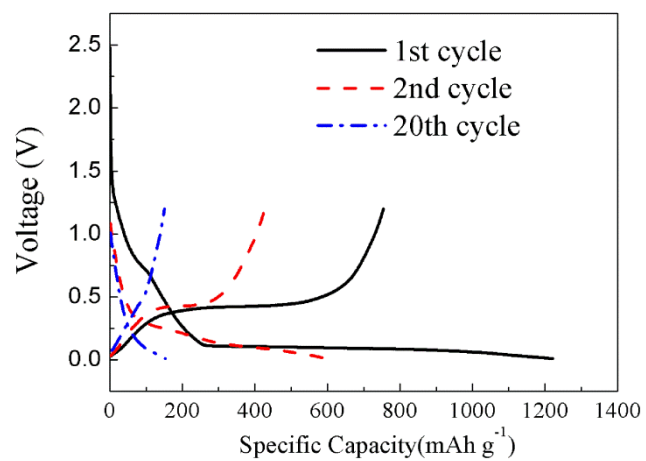

**Fig. S2.** Charge–discharge curves of the pSi obtained from NCLI without ball-milling pretreatment for the 1<sup>st</sup>, 2<sup>nd</sup> and 20<sup>th</sup> cycles at a current density of 0.05C for the initial two cycles and at 0.2C for the following cycles.

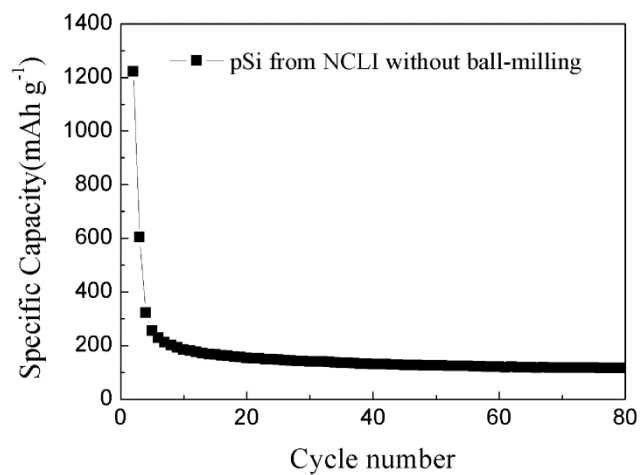

**Fig. S3.** Cycling performance of pSi obtained from NCLI without ball-milling pretreatment at a current density of 0.05C for the initial two cycles and at 0.2C for the following cycles.

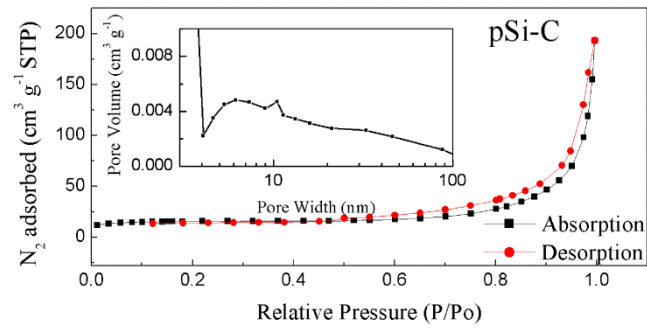

**Fig. S4.** Nitrogen adsorption–desorption isotherm linear plot of pSi-C and the inset is Barrett-Joyner-Halenda (BJH) pore size distribution.
